# Supplementary material for: Highly active CoNi nanoparticles confined in N-doped carbon microtubes for efficient catalytic performance
Source: Royal Society of Chemistry journal article supplement (doi:10.1039/d2dt02953g), 2022-01-01
Supplement: d2dt02953g1.pdf [file d2dt02953g1.pdf]

# Highly Active CoNi Nanoparticles Confined in N-doped Carbon Microtubes for Efficient Catalytic Performance

*Xiaoying He<sup>a</sup>, Min Zhang<sup>\*a</sup>, Ziqi Jin<sup>a</sup>, Jing Zheng<sup>a</sup>, Jingli Xu<sup>a</sup>, Xue-Bo Yin<sup>\*a</sup>*

<sup>a</sup> College of Chemistry and Chemical Engineering, Shanghai University of Engineering Science, Shanghai 201620, China.

\*Corresponding author: [zhangmin@sues.edu.cn](mailto:zhangmin@sues.edu.cn) (Min Zhang)  
[xbyin@nankai.edu.cn](mailto:xbyin@nankai.edu.cn)(Xue-Bo Yin)

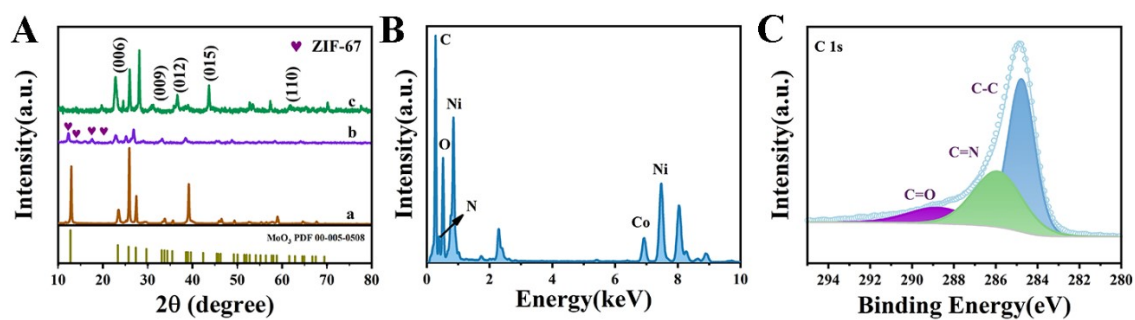

Fig. S1, (A)XRD images of MoO<sub>3</sub> (a), MoO<sub>3</sub>@ZIF-67 (b) and MoO<sub>3</sub>@CoNi-LDH and(B)EDX spectrum of CoNi@NCMTs-500 (C)XPS C1s spectrum of CoNi@NCMTs-500

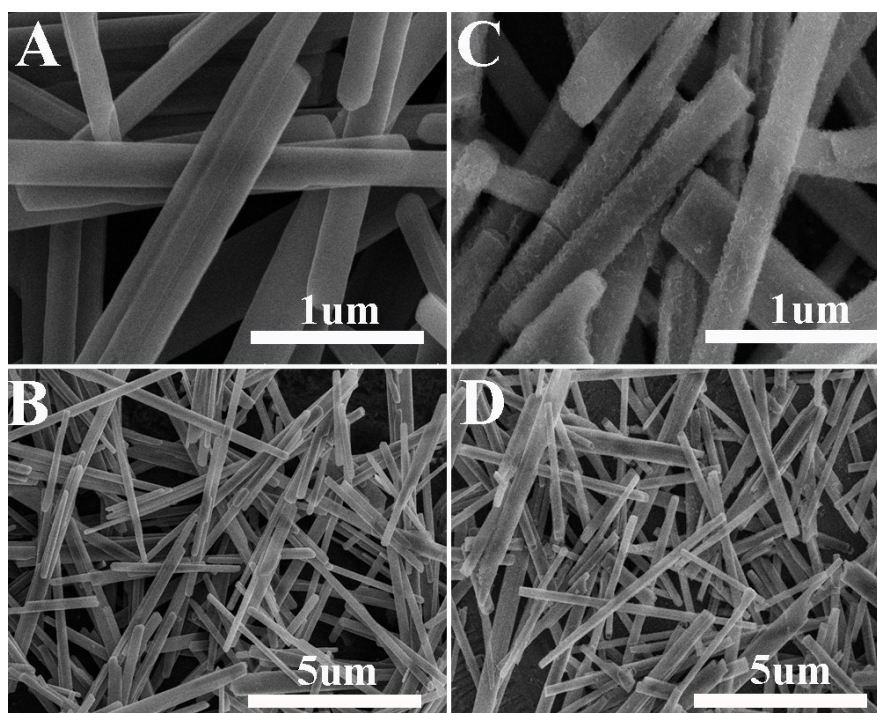

Fig. S2 SEM images of the resultant product: the reaction solvent of MoO<sub>3</sub> with Ni<sup>2+</sup> is anhydrous ethanol (A, B) (1h) and the mixed solution(1h) (ethanol and water 1:1 (C, D))

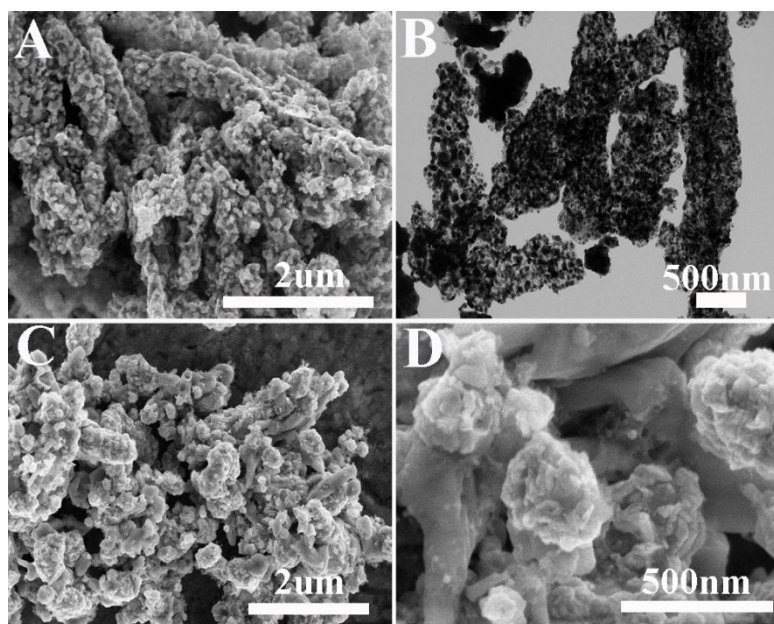

Fig. S3 SEM and TEM images of CoNi@NCMTs-700 (A, B); SEM images of CoNi@NCMTs-800 with different magnification (C, D)

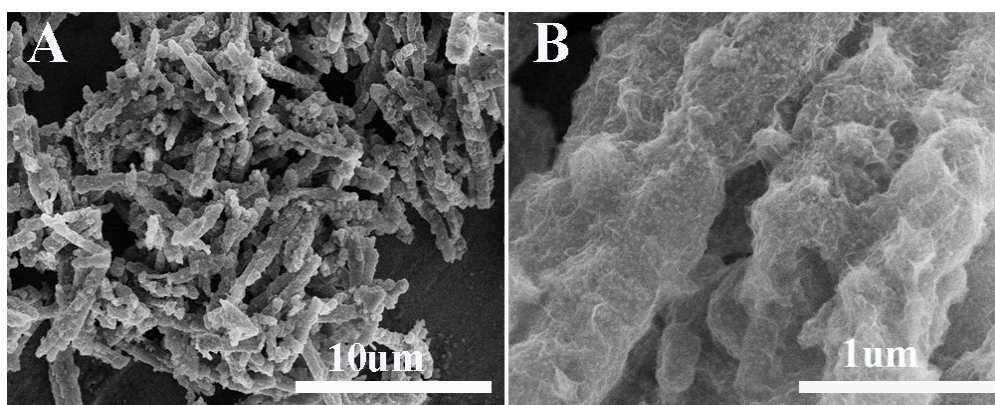

Fig. S4 SEM images of CoNi@NCMTs-500 after five catalytic reactions

Table S1 the element relative amount of CoNi@NCMTs-500

| Element | Mass% | Atom% |
|---------|-------|-------|
| C       | 51.26 | 73.94 |
| O       | 11.59 | 12.55 |
| N       | 2.71  | 3.36  |
| Ni      | 26.66 | 7.87  |
| Co      | 7.78  | 2.29  |

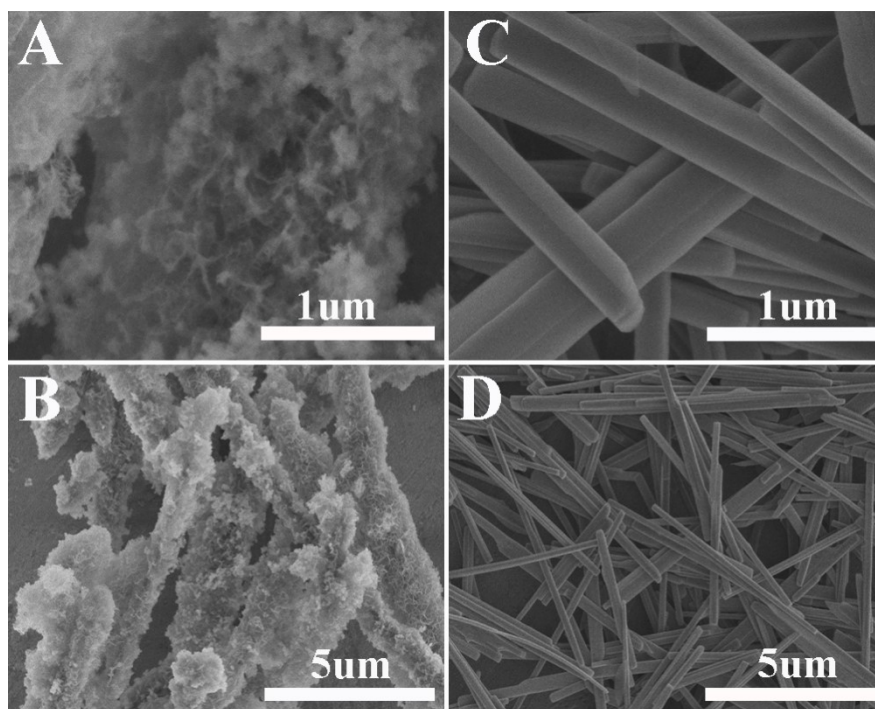

Fig. S5 SEM images of the resultant product: the reaction time of  $\text{MoO}_3@\text{ZIF-67}$  (A, B) and  $\text{MoO}_3$  with  $\text{Ni}^{2+}$  increased to 24 h (C, D) in ethanol and water 1:1

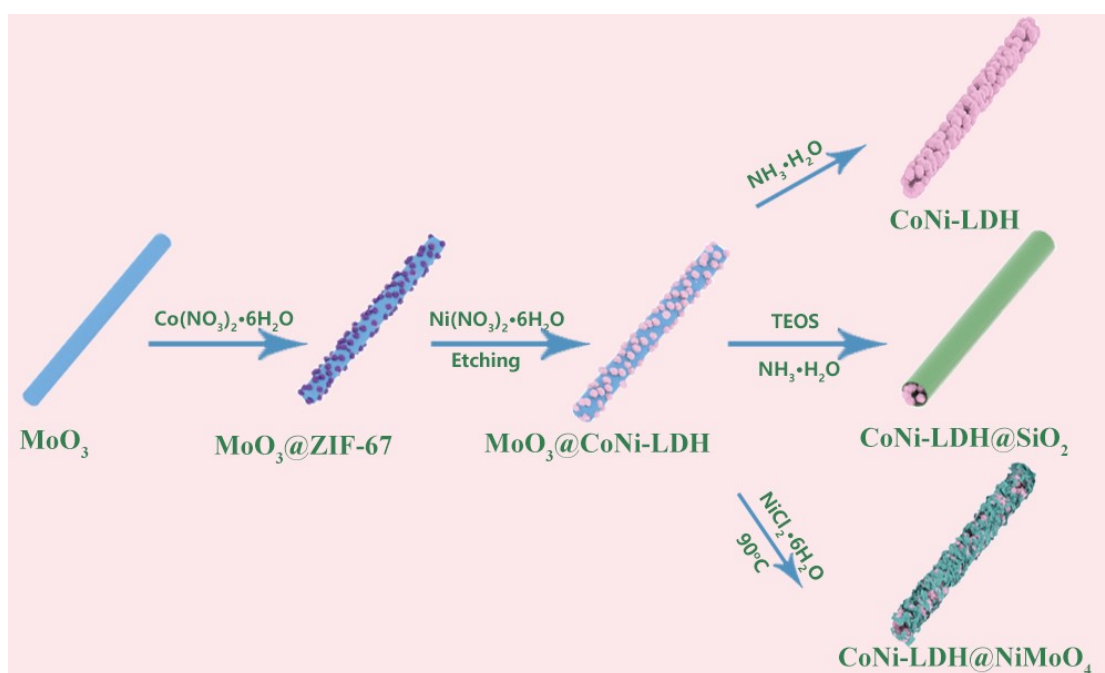

Scheme S1. Schematic illustration for the synthesis of CoNi-LDH, CoNi-LDH@SiO<sub>2</sub> and CoNi-LDH@NiMoO<sub>4</sub> composites with the MoO<sub>3</sub>@CoNi-LDH as the templates
